# Supplementary material for: Different solvents yield alternative crystal forms through aromatic, halogen bonding and hydrogen bonding competition
Source: Royal Society of Chemistry journal article supplement (doi:10.1039/c4ce02109f), 2014-11-25
Supplement: c4ce02109f1.pdf [file c4ce02109f1.pdf]

## Supplementary Material

# Different Solvents Yield Different Crystal Forms Through Aromatic, Halogen Bonding and Hydrogen Bonding Competition

Solhe F. Alshahateet,<sup>\*a</sup> Mohan M. Bhadbhade,<sup>b</sup> Roger Bishop<sup>c</sup> and Marcia L. Scudder<sup>c</sup>

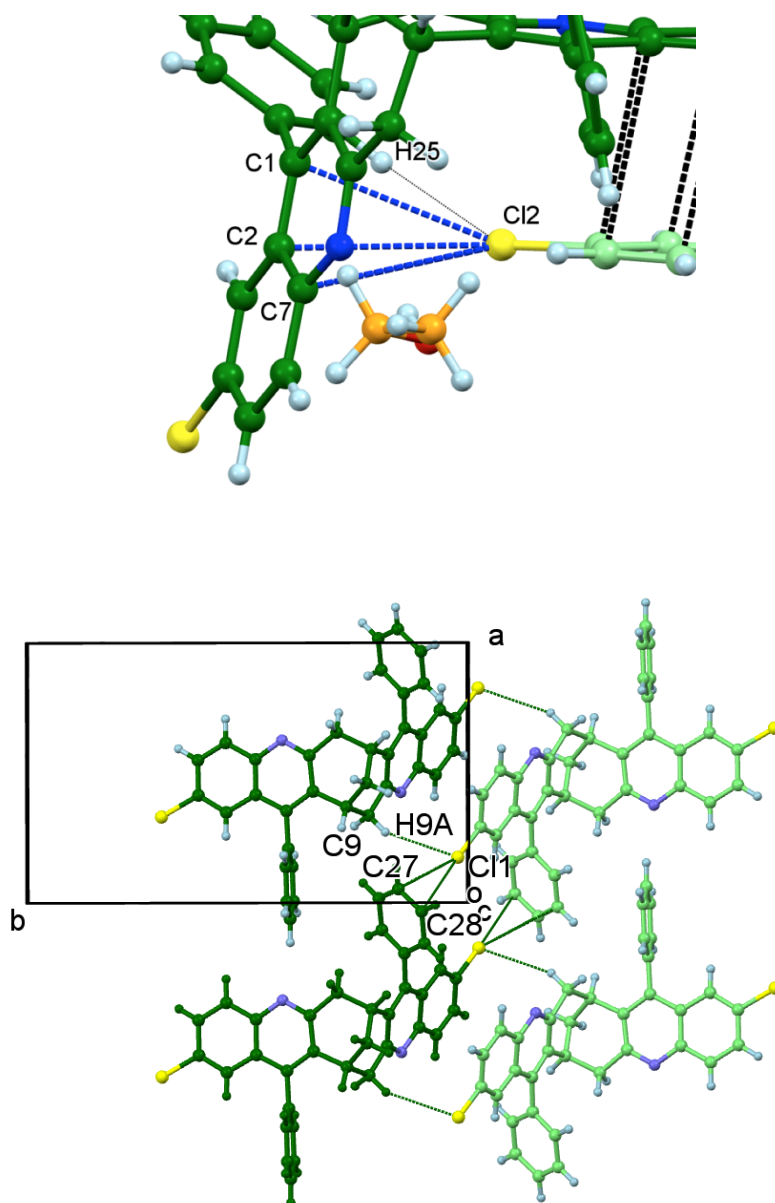

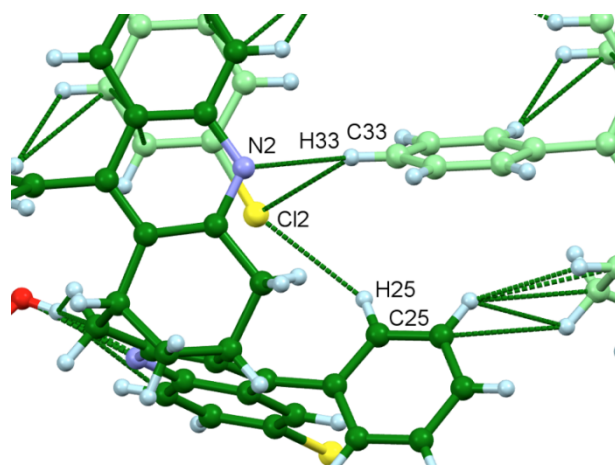

**Fig. S1** The alternative, but equivalent, numbering used to designate molecular interactions in the crystal structure of the isostructural inclusion compound (**8**). (ethanol).

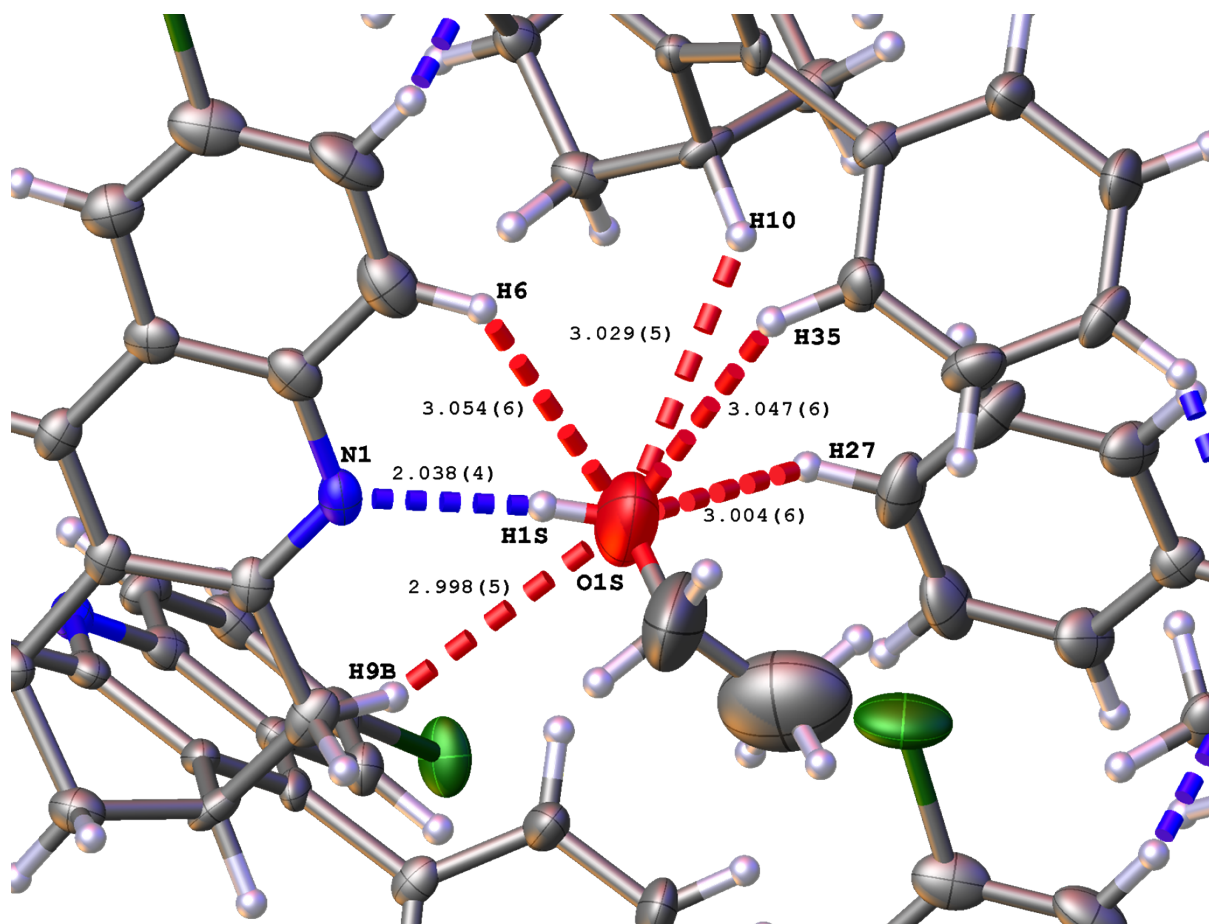

**Fig. S2** The spectrum of host-guest hydrogen bonding interactions present in (8).(ethanol). This comprises the N...H-O strong hydrogen bond (blue) and five C-H...O weak hydrogen bonds (red).

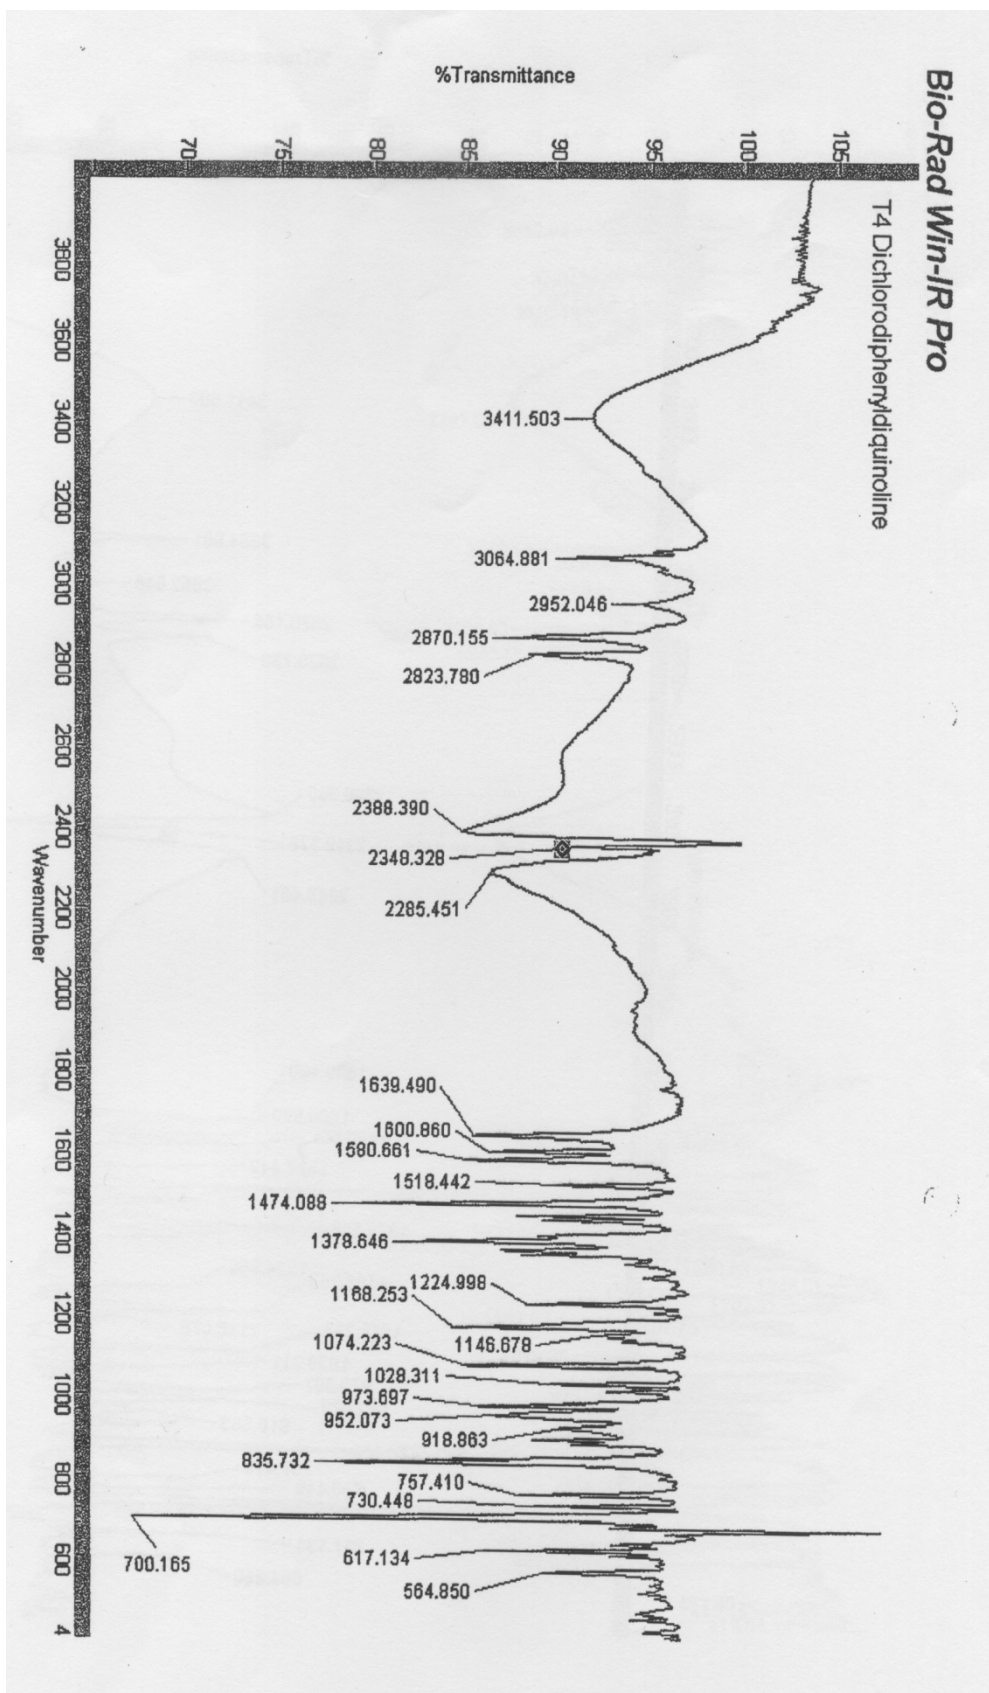

**Fig. S3** The IR spectrum of the host molecule **8**.

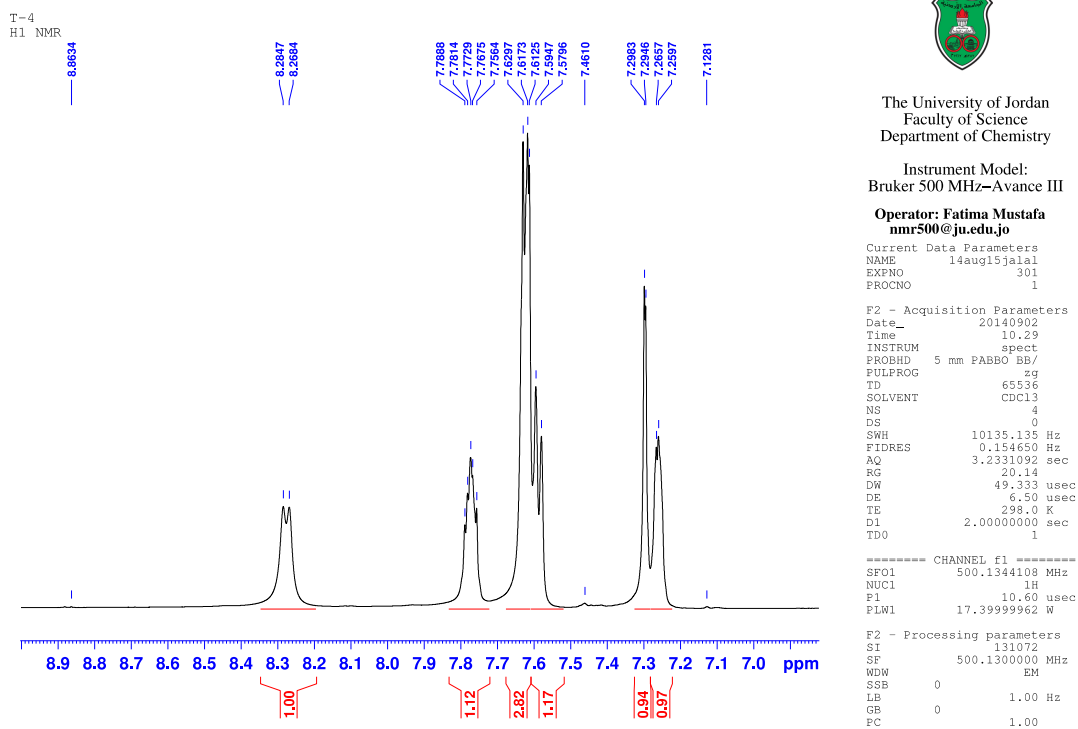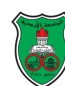

The University of Jordan  
Faculty of Science  
Department of Chemistry

Instrument Model:  
Bruker 500 MHz-Avance III

Operator: **Fatima Mustafa**  
nmr500@ju.edu.jo

Current Data Parameters  
NAME 14aug15jalal  
EXPNO 301  
PROCNO 1

T-4  
H1 NMR

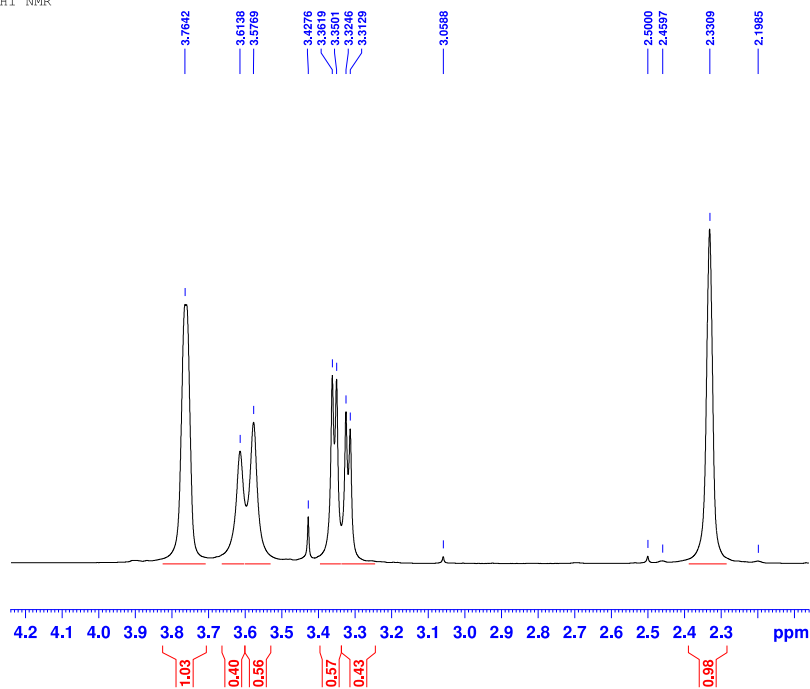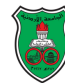

The University of Jordan  
Faculty of Science  
Department of Chemistry

Instrument Model:  
Bruker 500 MHz-Avance III

Operator: Fatima Mustafa  
nmr500@ju.edu.jo

Current Data Parameters  
NAME 14aug15jst1a1  
EXPNO 301  
PROCNO 1

F2 - Acquisition Parameters  
Date\_ 20140902  
Time 10.29  
INSTRUM spect  
PROBHD 5 mm PABBO BB/  
FULPROG zg  
TD 65536  
SOLVENT CDCl3  
NS 4  
DS 0  
SWH 10135.135 Hz  
FIDRES 0.154650 Hz  
AQ 3.2331092 sec  
RG 20.14  
DW 49.333 usec  
DE 6.50 usec  
TE 298.0 K  
D1 2.00000000 sec  
TDO 1

===== CHANNEL f1 =====  
SF01 500.1344108 MHz  
NUC1 1H  
F1 10.60 usec  
PLW1 17.39999962 W

F2 - Processing parameters  
SI 131072  
SF 500.1300000 MHz  
WDW EM  
SSB 0  
LB 1.00 Hz  
GB 0  
PC 1.00

Fig. S4 The  $^1\text{H}$  NMR spectrum of the host molecule **8**.

t4  
c13

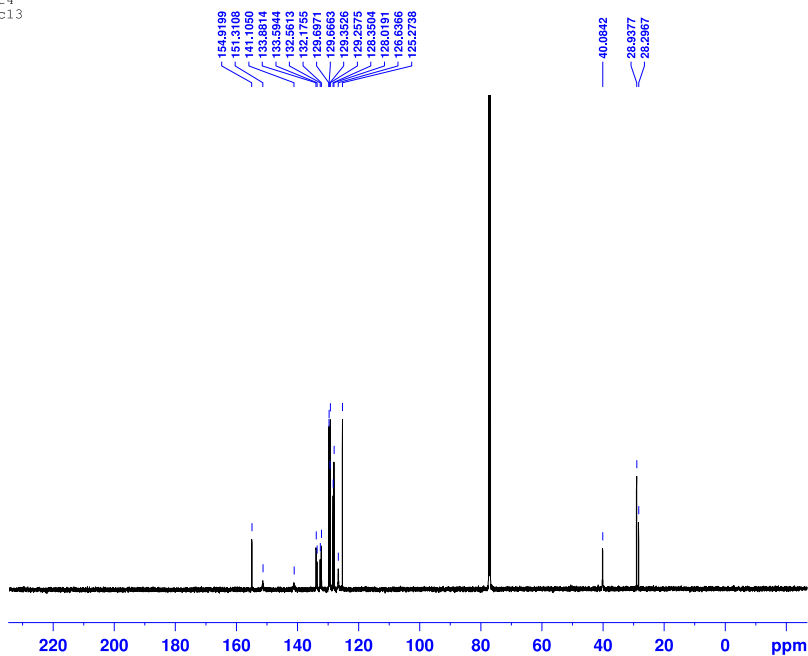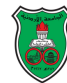

The University of Jordan  
Faculty of Science  
Department of Chemistry

Instrument Model:  
Bruker 500 MHz-Avance III

Operator: Fatima Mustafa  
nmr500@ju.edu.jo

Current Data Parameters  
NAME 14aug15jalal  
EXPNO 302  
PROCNO 1

F2 - Acquisition Parameters  
Date\_ 20140902  
Time 10.41  
INSTRUM spect  
PROBHD 5 mm PABBO BB/  
PULPROG zgpg30  
TD 6536  
SOLVENT CDCl3  
NS 2048  
DS 4  
SWH 32894.738 Hz  
FIDRES 0.501934 Hz  
AQ 0.9961472 sec  
RG 202.06  
DW 15.200 usec  
DE 6.50 usec  
TE 298.0 K  
D1 2.0000000 sec  
D11 0.0300000 sec  
TD0 1

----- CHANNEL f1 -----  
SFO1 125.770561 MHz  
NUC1 13C  
P1 10.60 usec  
PLM1 17.39999962 W

----- CHANNEL f2 -----  
SFO2 500.1320005 MHz  
NUC2 1H  
PCPD2 wal116  
PCPD2 80.00 usec  
PLM2 17.37800026 W  
PLM12 0.36307999 W  
PLM13 0.22982000 W

F2 - Processing parameters  
SI 32768  
SF 125.7577890 MHz  
WDW EM  
SSB 0  
LB 1.00 Hz  
GB 0  
PC 1.40

t4  
c13

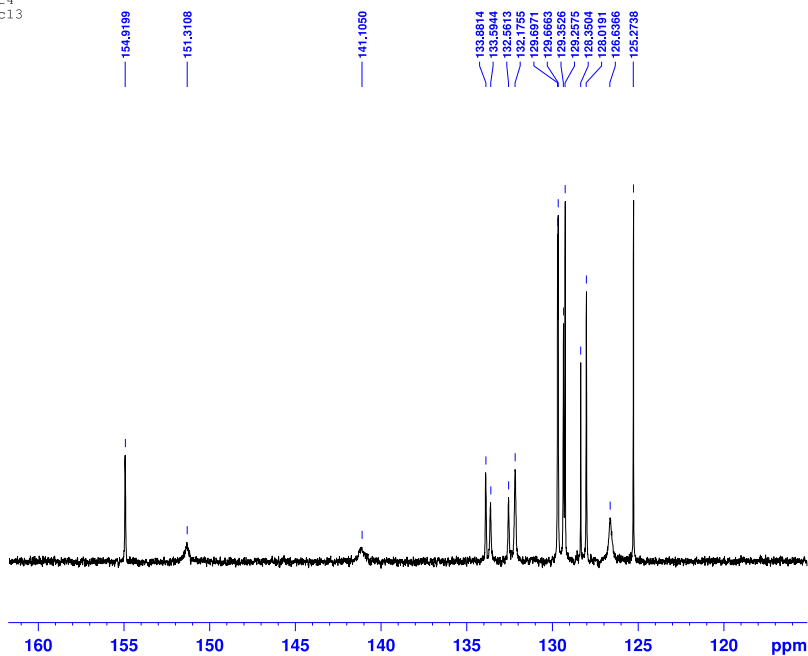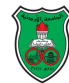

The University of Jordan  
Faculty of Science  
Department of Chemistry

Instrument Model:  
Bruker 500 MHz–Avance III

Operator: Fatima Mustafa  
nmr500@ju.edu.jo

```
Current Data Parameters
NAME      14aug15jalal
EXPNO     302
PROCNO    1

F2 - Acquisition Parameters
Date_     20140902
Time      10.41
INSTRUM   spect
PROBHD    5 mm PABBO BB/
PULPROG   zgpg30
TD         65536
SOLVENT   CDCl3
NS         2048
DS         4
SWH        32894.738 Hz
FIDRES     0.501934 Hz
AQ          0.9961472 sec
RG          202.06
DW          15.200 usec
DE          6.50 usec
TE          298.0 K
D1          2.0000000 sec
D11         0.0200000 sec
TD0         1

----- CHANNEL f1 -----
SFO1      125.7708661 MHz
NUC1       13C
P1         10.60 usec
PLM1      17.39999962 W

----- CHANNEL f2 -----
SFO2      500.1320005 MHz
NUC2       1H
PCPD2     wal1216
PCPD2     80.00 usec
PLM2      17.37800026 W
PLM12     0.36307899 W
PLM13     0.22982000 W

F2 - Processing parameters
SI         32768
SF         125.7577890 MHz
SF         EM
SSB        0
LB         1.00 Hz
GB         0
PC         1.40
```

**Fig. S5**  $^{13}\text{C}$  NMR spectrum of **8**. The three broad signals at 151.31, 141.11 and 126.64  $\delta$  indicate a slow conformational equilibrium occurring on the NMR timescale. This phenomenon is relatively common for bridged molecules of limited flexibility at laboratory temperature.
